# Supplementary material for: Medical Students’ Perceptions towards Digitization and Artificial Intelligence: A Mixed-Methods Study
Source: MDPI journal article supplement (doi:10.3390/healthcare10040723), 2022-04-13

### Supplementary Materials

**Table S1** Interview themes in 28 students of five German universities (qualitative study part)

| Reference group | Primary interview topic                                          | Adjunct queries                                                                                                                                                                                                                                                                                                                                                                                                                                                                                      |
|-----------------|------------------------------------------------------------------|------------------------------------------------------------------------------------------------------------------------------------------------------------------------------------------------------------------------------------------------------------------------------------------------------------------------------------------------------------------------------------------------------------------------------------------------------------------------------------------------------|
| Patients        | Personal assessment of digitization from the patient perspective | <p>Judgment of digitization in patient self-management including the interaction with the health-care system</p> <p>Unities and pitfalls of digitization in medical self-diagnostics</p> <p>Opportunities and risks of various digital tools in medicine, the patient might use:</p> <ul style="list-style-type: none"> <li>• The internet affine patient</li> <li>• Health apps</li> <li>• Wearables</li> </ul>                                                                                     |
| Physicians      | Assessment of eHealth                                            | <p>Artificial intelligence</p> <p>Digitization in treatment decision making</p> <p>Digitization in the diagnostic workup</p> <p>Aspects of eHealth:</p> <ul style="list-style-type: none"> <li>• Electronic health records</li> <li>• Patients health card</li> <li>• Digitized archiving</li> <li>• Digitization of administrative duties</li> </ul> <p>Digitized communication (with peers, with patients, with health care providers etc.)</p> <p>Telemedicine</p> <p>Machines in health care</p> |
| Students        | Digitization as part of the medical curriculum                   | <p>Lectures in eHealth</p> <p>Introduction in digitization in medicine</p> <p>Personal appreciation (technological progress vs nuisance) of eHealth</p>                                                                                                                                                                                                                                                                                                                                              |

**Table S2** Students perceptions on health apps (lay and professional health apps).

| <b>Health apps: impact on the doctor's side (students' perspective)</b>  |                                                                                                                                                                                                                                                                                                                                                                                                                                                                                          |
|--------------------------------------------------------------------------|------------------------------------------------------------------------------------------------------------------------------------------------------------------------------------------------------------------------------------------------------------------------------------------------------------------------------------------------------------------------------------------------------------------------------------------------------------------------------------------|
| <i>restrained:</i>                                                       | <ul style="list-style-type: none"> <li>• Professional health apps compete against doctor's knowledge and expertise</li> <li>• Reservations towards digital evolution</li> <li>• Being forced to constantly update medical knowledge is cumbersome</li> <li>• Older doctors may refuse to use diagnostic apps</li> <li>• Apps only supportive for technical enthusiasts</li> </ul>                                                                                                        |
| <i>undecided or positive</i>                                             | <ul style="list-style-type: none"> <li>• Apps are supportive for doctors' decision finding</li> <li>• Apps are both: a challenge as well as chance</li> <li>• Apps may be superior to doctors knowledge and expertise</li> <li>• Apps as a useful quick-reference source</li> <li>• Professional apps help to counterbalance lay health apps used by patients</li> </ul>                                                                                                                 |
| <b>Health apps: impact on the patient's side (students' perspective)</b> |                                                                                                                                                                                                                                                                                                                                                                                                                                                                                          |
| <i>restrained</i>                                                        | <ul style="list-style-type: none"> <li>• Lay health apps as a competition to doctor's expertise</li> <li>• Apps generate wrong diagnosis, reliability is questionable</li> <li>• Apps alienate and perturb lay users, particularly when the doctor has a different view</li> <li>• Apps may give wrong advise</li> <li>• Apps may generate unnecessary doctor consultations and emergency visits</li> <li>• Apps may prevent timely doctor consultations through wrong advise</li> </ul> |
| <i>undecided or positive</i>                                             | <p>Health apps support the search of medical information</p> <ul style="list-style-type: none"> <li>• Apps are both: a challenge as well as chance</li> </ul>                                                                                                                                                                                                                                                                                                                            |

**Table S3** Students perceptions on wearables use by patients

| <b>Wearables</b>                                                                                                                                                                                                                                                                                                                                                                                                                                                                                                                                                                                                                                                                                                                                                                                    |
|-----------------------------------------------------------------------------------------------------------------------------------------------------------------------------------------------------------------------------------------------------------------------------------------------------------------------------------------------------------------------------------------------------------------------------------------------------------------------------------------------------------------------------------------------------------------------------------------------------------------------------------------------------------------------------------------------------------------------------------------------------------------------------------------------------|
| <i>restrained</i> <ul style="list-style-type: none"><li>• Wearables weaken self-determination by influencing ones life schedule</li><li>• are not medical certified and may generate wrong signals</li><li>• may alienate and perturb users (inaccurate data even more so)</li><li>• To rely solely on wearables may cause an undesired dependency</li></ul>                                                                                                                                                                                                                                                                                                                                                                                                                                        |
| <i>undecided or positive</i> <ul style="list-style-type: none"><li>• perfect for physical self-assessment</li><li>• motivating to stay physically fit</li><li>• indicate patient's health consciences an helps ones self-determination regarding physical fitness</li><li>• Boon and bane</li><li>• help to improve patient therapeutic adherence</li><li>• may improve patient-doctor relationship if the use is consented</li><li>• support patients in self-controlling treatment success</li><li>• help patients to discern their physical limits</li><li>• some patients accept to be controlled by wearables but some not, both notions have to be tolerated by the doctor</li><li>• may help to detect medical problems early including emergency situation (epilepsy, arrhythmia)</li></ul> |

**Table S4** Students perceptions on telemedicine.

| Telemedicine                                                                                                                                                                                                                                                                                                                                                                                                                                                                                                                                                                                                                                                                                                                                                                                                                                                                                                                                         |
|------------------------------------------------------------------------------------------------------------------------------------------------------------------------------------------------------------------------------------------------------------------------------------------------------------------------------------------------------------------------------------------------------------------------------------------------------------------------------------------------------------------------------------------------------------------------------------------------------------------------------------------------------------------------------------------------------------------------------------------------------------------------------------------------------------------------------------------------------------------------------------------------------------------------------------------------------|
| <i>restrained</i> <ul style="list-style-type: none"><li>• good examples (e.g. from Australia) not easily transferred to other countries</li><li>• not generally a good option in health care</li><li>• unclear liability issues</li><li>• lively patient-doctor contact generally better than virtual consultations</li></ul>                                                                                                                                                                                                                                                                                                                                                                                                                                                                                                                                                                                                                        |
| <i>undecided or positive</i> <ul style="list-style-type: none"><li>• enable quick patient-doctor consultations and saves traveling time</li><li>• physical contact with health care institutions is less needed (saves resources)</li><li>• eases consultations with handicapped patients (with travel difficulties)</li><li>• Useful in sparsely populated states: easing patient-doctor consultations</li><li>• Helps paramedics in emergency situations through remote doctor consultation</li><li>• Supportive in remote medical monitoring of chronically ill</li><li>• Reduces physically consultations and ameliorate patient's quality of life</li><li>• Enhances patients' independence</li><li>• Eases number of doctors needed per population</li><li>• Enable 7/24 consultations</li><li>• Automation of data transfer and analysis saves working time</li><li>• Telemedicine, video-chats, symptom tracker support each other</li></ul> |

**Table S5** Students perceptions on digitization in patient management (hospital, ambulatory).

| <b>Digitization in hospital and in out-patient care</b>                                                                                                                                                                                                                                                                                                                                                                                                                                                                                                                                          |
|--------------------------------------------------------------------------------------------------------------------------------------------------------------------------------------------------------------------------------------------------------------------------------------------------------------------------------------------------------------------------------------------------------------------------------------------------------------------------------------------------------------------------------------------------------------------------------------------------|
| <i>restrained</i><br>Prioritization of computer work causing negligence of patients<br>Personal resistance towards usages of digitized tools<br>Reduced personal communication with peers and nurse-doctor-interaction<br>Electronic patient management requires readiness from potential users<br>Digitization results in reduced personal nurse-doctor-interaction<br>Ubiquitous data access reduces the demand to memorize data                                                                                                                                                               |
| <i>positive</i><br>Feed back on drug side effects, drug-drug-interaction, cheapest alternative<br>Electronic patient records: superiority over paper based records through e.g. flexible data access, reliable archiving and documentation, clarity, time saving<br>Easy lookup (patient data, med. literature) and high flexibility in usage<br>Easy communication with peers, between institutions and with patients (digitized consultation)<br>Software solutions supportive in diagnostics, therapy and documentation<br>Easy networking of different workflows, interactions of procedures |

**Table S6** Students' perceptions regarding data security.

| <b>Data protection / security</b>                                                                                                                                                                                                                                                                                                                                                                                                                                                                                                                                                                                                                                                                                                                              |
|----------------------------------------------------------------------------------------------------------------------------------------------------------------------------------------------------------------------------------------------------------------------------------------------------------------------------------------------------------------------------------------------------------------------------------------------------------------------------------------------------------------------------------------------------------------------------------------------------------------------------------------------------------------------------------------------------------------------------------------------------------------|
| <i>Concerns</i><br>You never know who uses personal data (e.g. health insurance companies) with grave consequences<br>General concerns of becoming a transparent citizen<br>Concern to loose owns health card with all the personal data<br>Concern of data loss of "critical health data" (e.g. HIV infection)<br>Data protection laws restrain doctor's work in quick patient handling<br>Concerns causes patients to become overcautious or secretive<br>Protection of personal (health) data is a general issue (WhatsApp, open WLAN) and needs to be addressed thoroughly<br>Unclear judicial responsibilities and possible legal consequences<br>Data collection and usage only with patients' consent and data access strictly regulated to avoid abuse |
| <i>No concerns</i><br>No concerns, because patients need to open up to the doctor anyway<br>"Push this thought simply aside"<br>information, thus health data is only of small concern<br>Benefits of data collections outweigh concerns of data security                                                                                                                                                                                                                                                                                                                                                                                                                                                                                                      |

**Table S7** Students' perceptions regarding robotic and intelligence (AI) in medicine

| <b>Robotic in medicine</b>                                                                                                                                                                                                                                                                                                                                                                                                                                                                                                                                                                                                                                                                                                                                                                                                                                                                                                                                                                                                                                                                                                                                                                                                                                                                                                                                                                                                                                                                                                                                                                                              |
|-------------------------------------------------------------------------------------------------------------------------------------------------------------------------------------------------------------------------------------------------------------------------------------------------------------------------------------------------------------------------------------------------------------------------------------------------------------------------------------------------------------------------------------------------------------------------------------------------------------------------------------------------------------------------------------------------------------------------------------------------------------------------------------------------------------------------------------------------------------------------------------------------------------------------------------------------------------------------------------------------------------------------------------------------------------------------------------------------------------------------------------------------------------------------------------------------------------------------------------------------------------------------------------------------------------------------------------------------------------------------------------------------------------------------------------------------------------------------------------------------------------------------------------------------------------------------------------------------------------------------|
| Robots support surgeons (easing working conditions)<br>Diagnostic robots in direct patient application misses human interaction<br>Robots support doctors but will never replace them completely<br>Surgical robots allows remote surgical applications performed by distant experts<br>Surgical robots help to avoid human faultiness vs. are less fault-prone than year long experienced doctors<br>Surgical robots (with joystick operation) are fascinating<br>Robotic nurses support human nurses/doctors with simple tasks<br>Robots saves time for other more complicated tasks in patient care<br>Robots never compete with humans through lack of human interaction                                                                                                                                                                                                                                                                                                                                                                                                                                                                                                                                                                                                                                                                                                                                                                                                                                                                                                                                            |
| <b>Artificial intelligence</b>                                                                                                                                                                                                                                                                                                                                                                                                                                                                                                                                                                                                                                                                                                                                                                                                                                                                                                                                                                                                                                                                                                                                                                                                                                                                                                                                                                                                                                                                                                                                                                                          |
| <i>restrained</i><br>Unclear judicial responsibilities: doctor, hospital or software company ?<br>AI make doctors dependent and may result in loss of skills<br>AI lacks empathy and human touch<br>AI can get out of hand though autonomy (like in the movie iRobot)<br>Also AI has its limits particularly in rare and complex cases.<br>Intrinsic distrust against AI<br>AI lacks empathy and human touch<br>AI make doctors dependent and may result in loss of skills/knowledge<br>Computer and AI will never redundantize doctors ("absurd thought")<br>AI in direct patient contact may consternate elderly patients<br><br><i>positive or undecided</i><br>Great potential, support doctors decision finding. AI elevates doctors work on a new level<br>Doctors must be trained to understand underlying algorithms<br>Doctor must function as back-up when AI fails. Only doctors can make the ultimate medical decision not AI<br>boon and bane: ideal to support doctors but should not replace them<br>AI redundantize doctors, e.g. in radiology<br>Speeds up diagnostic work-up, frees doctor working time (e.g. Radiology)<br>AI is better than human doctors (e.g. in rare diseases), detect and avoid common human mistakes, is faster<br>Virtual reality and other AI applications are supportive and exciting<br>AI creates a different type of jobs in health care. AI helps to economize health care<br>AI can overtake many tasks, thus time in medical school could be trimmed<br>AI helps young inexperienced doctors<br>Never thought about AI, clueless (because not part of the curriculum) |

**Figure S1** Students' perceptions on "the internet affine patient"

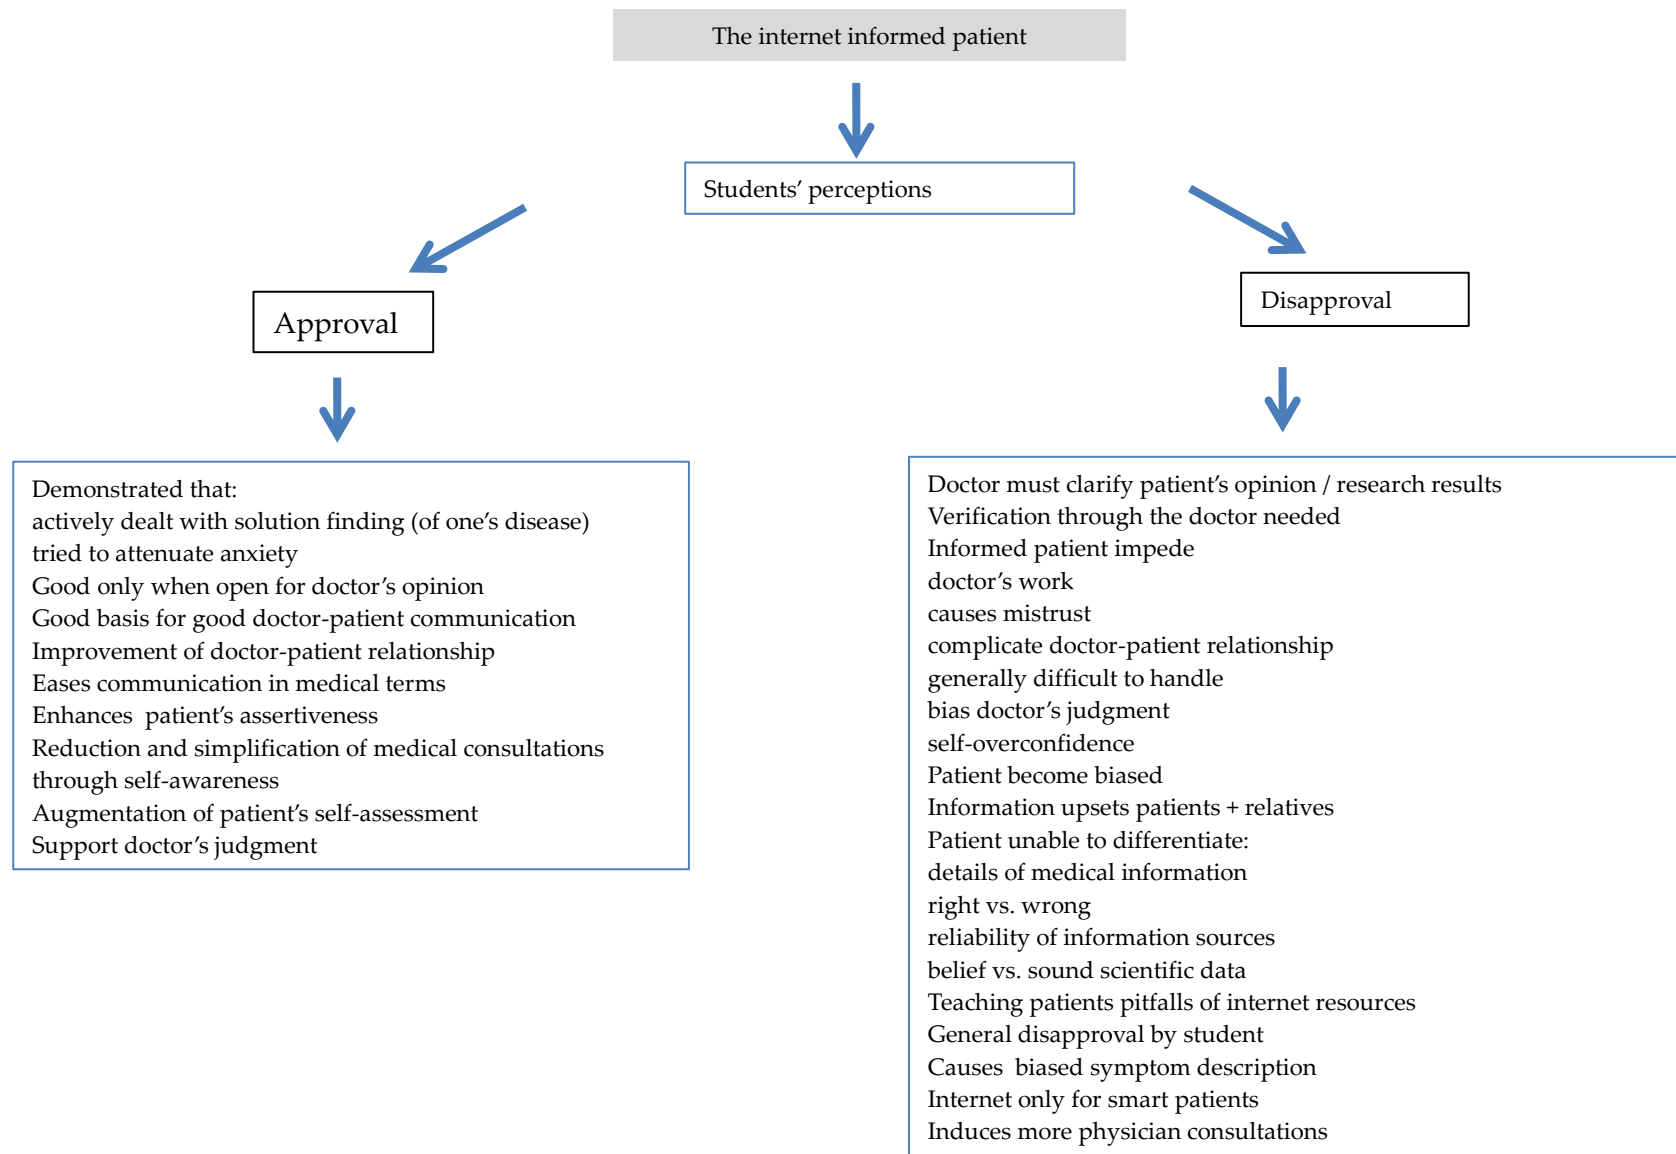

Supplement: s1 [file s1]
